# Supplementary material for: Two isomeric Zn(ii)-based metal–organic frameworks constructed from a bifunctional triazolate–carboxylate tecton exhibiting distinct gas sorption behaviors
Source: Royal Society of Chemistry journal article supplement (doi:10.1039/c6ce00126b), 2016-01-01
Supplement: c6ce00126b1.pdf [file c6ce00126b1.pdf]

*Electronic Supplementary Information*

**Two isomeric Zn(II)-based metal-organic frameworks constructed  
from a bifunctional triazolate-carboxylate tecton exhibiting  
distinct gas sorption behaviors**

**Di-Ming Chen, Jia-Yue Tian, Shao-Ming Fang and Chun-Sen Liu\***

Henan Provincial Key Laboratory of Surface & Interface Science, Zhengzhou University of  
Light Industry, Zhengzhou 450002, P. R. China

\*E-mail: [chunsenliu@zzuli.edu.cn](mailto:chunsenliu@zzuli.edu.cn)

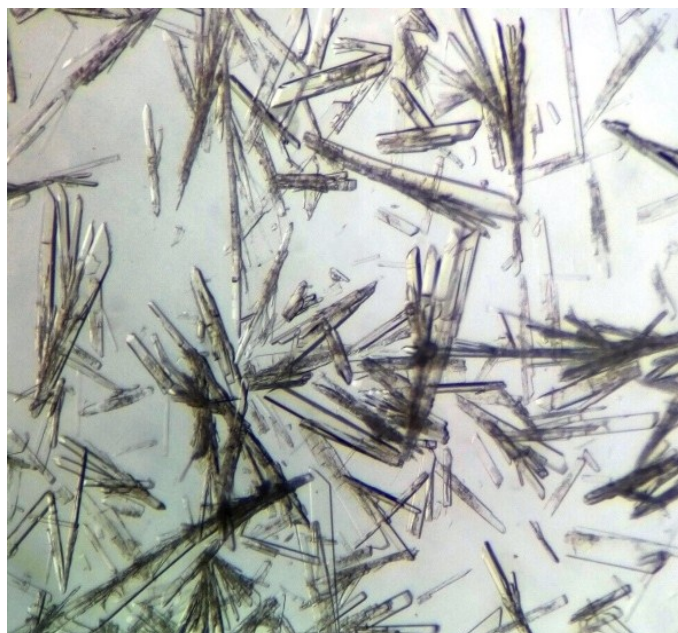

(a)

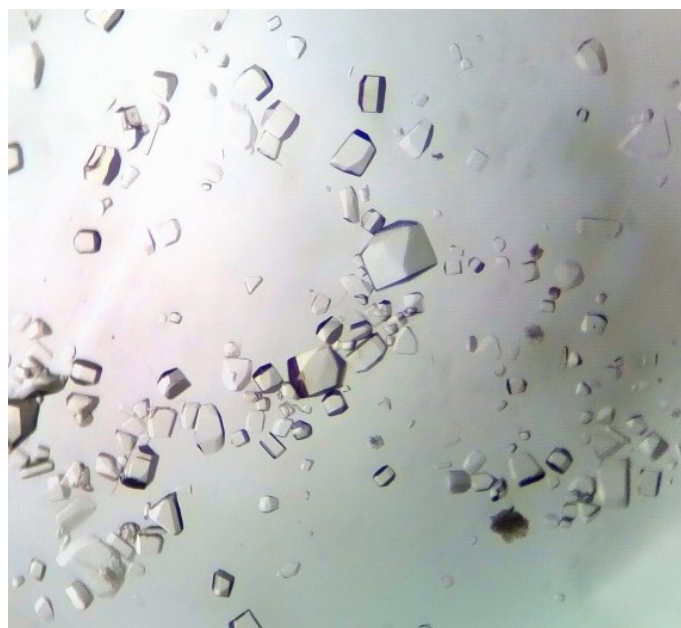

(b)

**Fig. S1** Optical microscopic photographs of **1(a)** and **2(b)**.

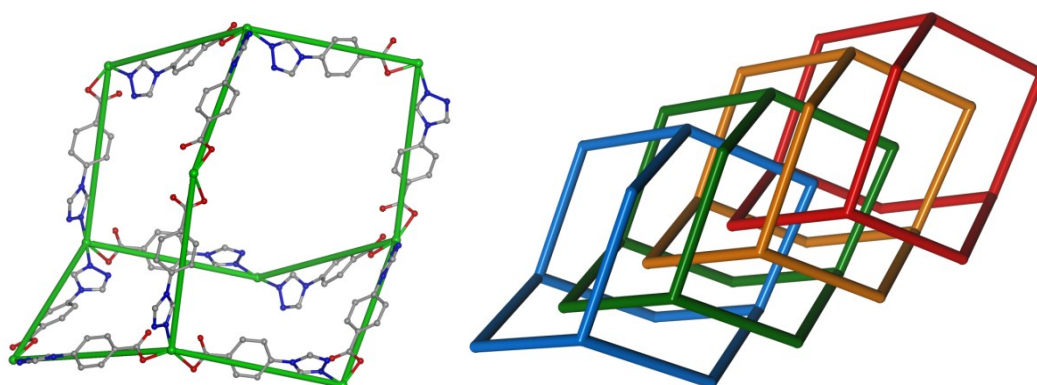

**Fig. S2** A single diamond net (left) and topological representation of the 4-fold interpenetrated diamond net (right) in **1** and **2**.

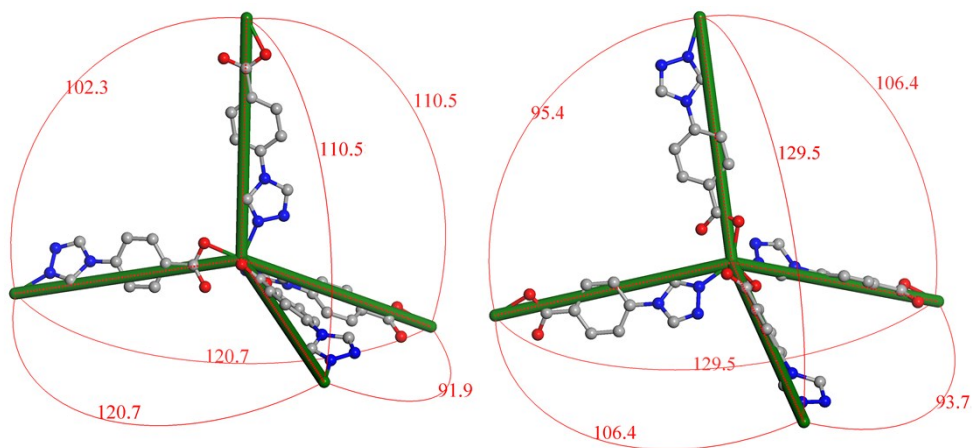

**Fig. S3** The Zn...Zn...Zn angles for **1**(left) and **2**(right).

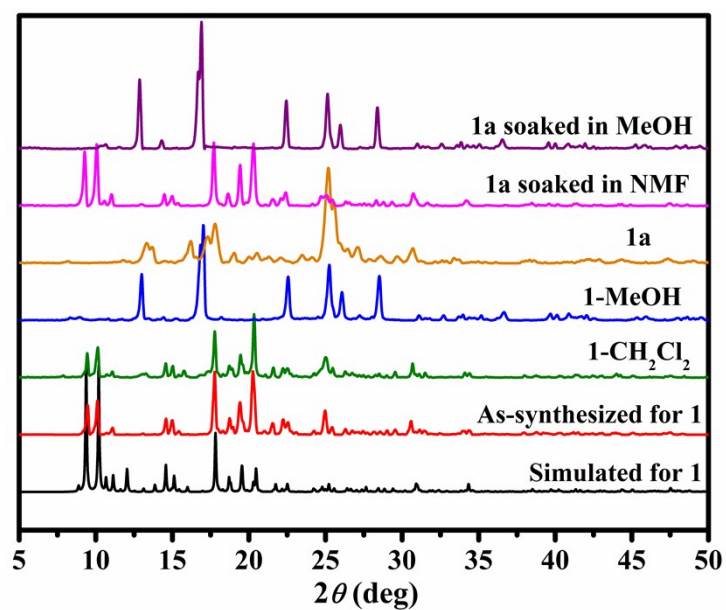

(a)

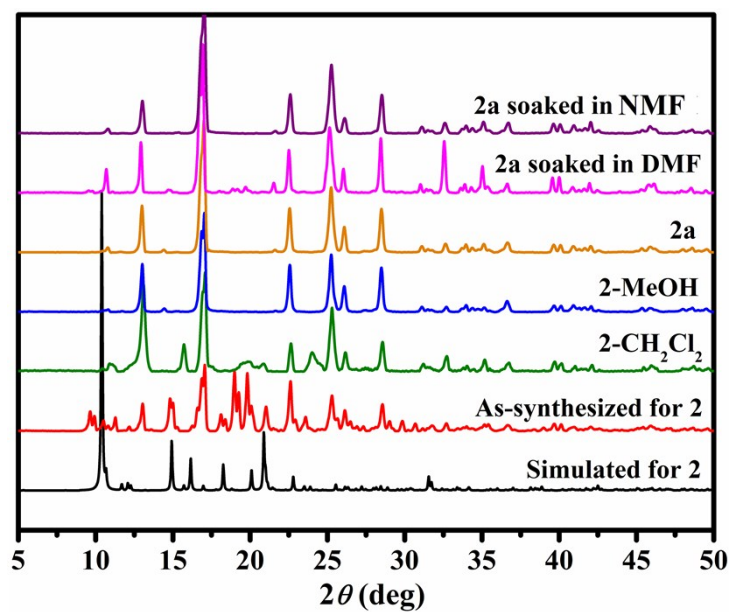

(b)

Fig. S4 PXRD patterns of 1(a) and 2(b).

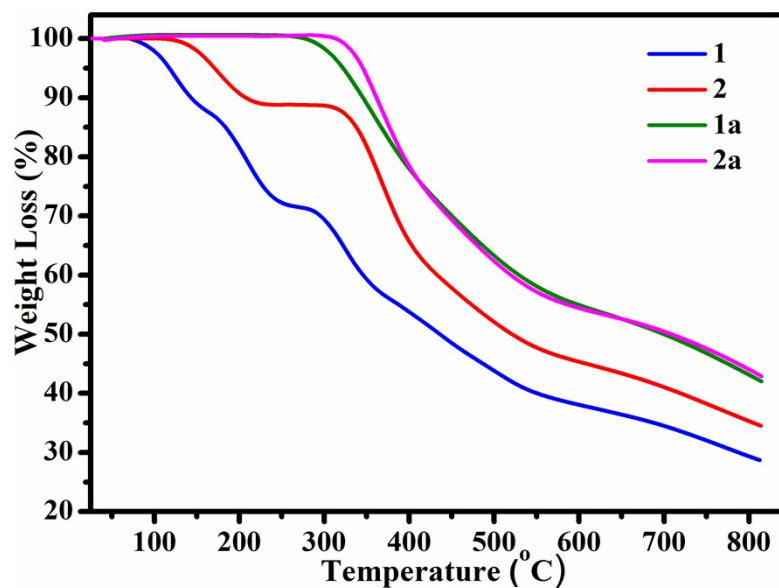

Fig. S5 TGA curves for 1, 1a, 2, and 2a.

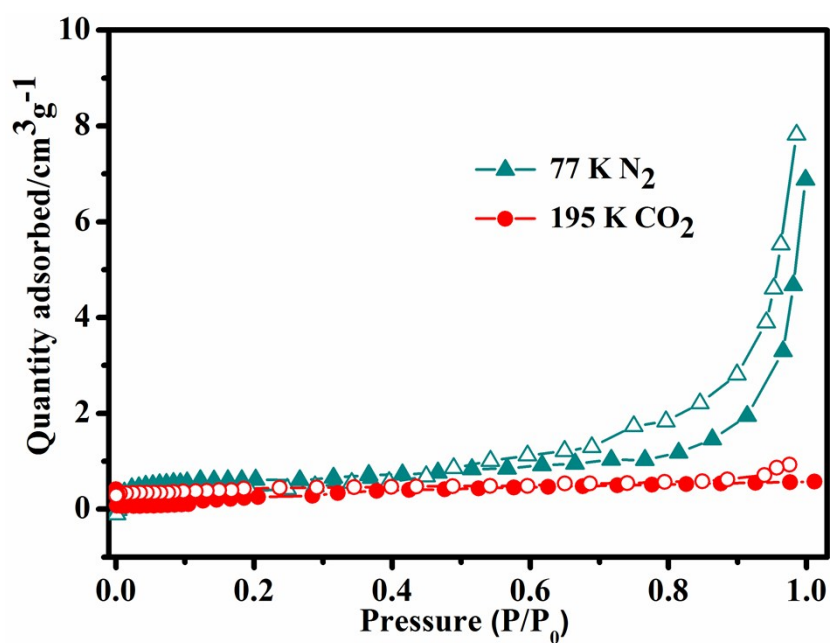

Fig. S6 Sorption isotherms of 2a: CO<sub>2</sub> at 195 K and N<sub>2</sub> at 77 K.

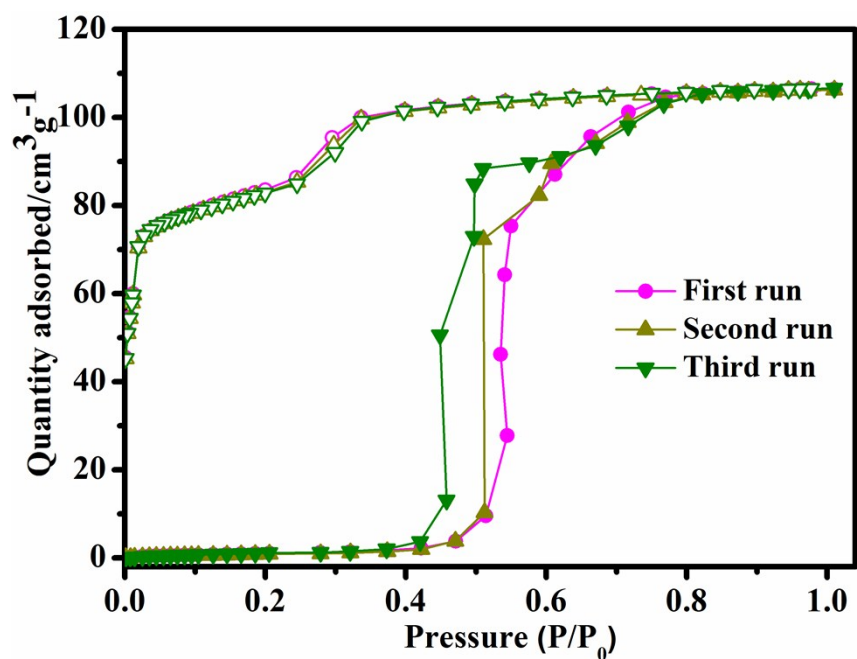

Fig. S7 Three-runs sorption isotherms of **1a** for CO<sub>2</sub> at 195 K.

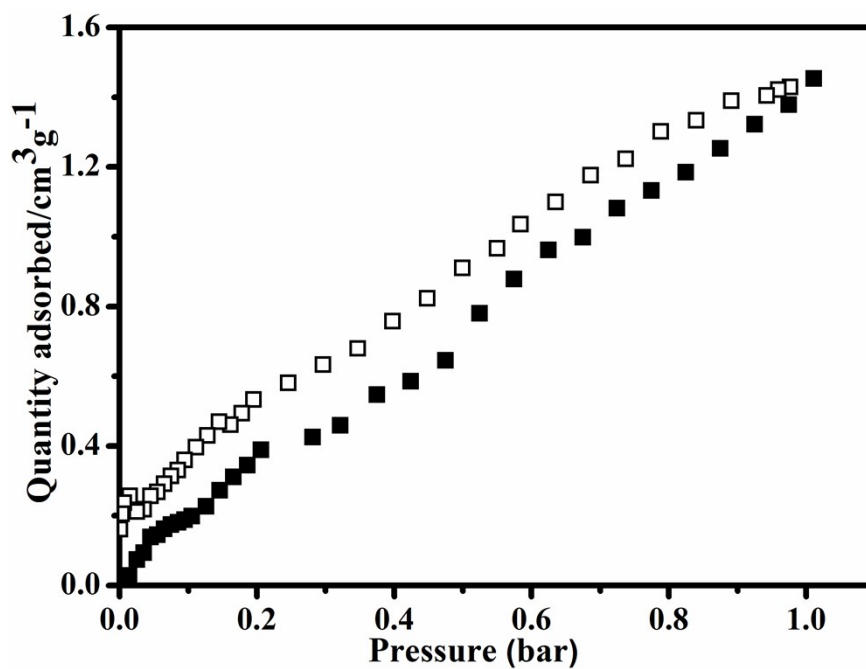

Fig. S8 Sorption isotherm of **1a** for CO<sub>2</sub> at 273 K.

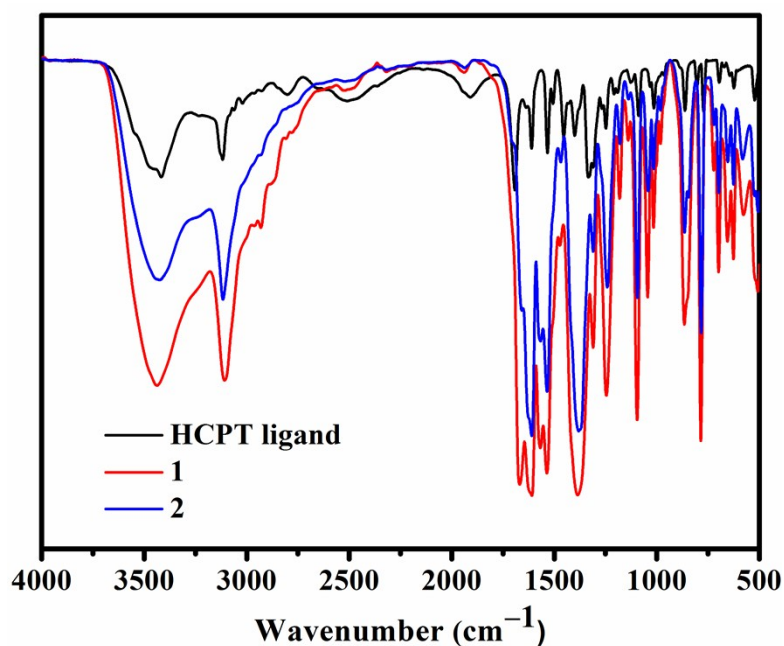

**Fig. S9** IR spectra for HCPT ligand (black), **1**(red), and **2**(blue).

## Computational details.

The potential surface of the torsion between the triazol ring and phenyl ring of HCPT were calculated by the conformers calculation in Material Studio 8.0 with a step-width of 2 degree. MM calculations for the framework energy of the structures were performed with the smart algorithm based on the universal forcefield (UFF) in the Forcite module. The charge-Eq method was used to calculate the charges of the framework.

```
#####  
TOPOS analysis results for 1  
#####
```

Topology for Zn1

-----

Atom Zn1 links by bridge ligands and has

Common vertex with

R(A-A)



|      |         |         |         |          |         |   |
|------|---------|---------|---------|----------|---------|---|
| Zn 1 | 0.7423  | -0.5110 | -0.0327 | ( 0-1 0) | 12.058A | 1 |
| Zn 1 | -0.2577 | -0.5110 | -0.0327 | (-1-1 0) | 12.058A | 1 |
| Zn 1 | 0.2423  | 0.4890  | -0.4673 | ( 0 0-1) | 12.102A | 1 |
| Zn 1 | 0.2423  | 0.4890  | 0.5327  | ( 0 0 0) | 12.102A | 1 |

-----  
Structural group analysis  
-----

-----  
Structural group No 1  
-----

Structure consists of 3D framework with Zn

There are 4 interpenetrating nets

TIV: Translating interpenetration vectors  
-----

[0,1,0] (15.88A)  
-----

NISE: Non-translating interpenetration symmetry elements  
-----

1: -1  
-----

PIC: [0,2,0][1,0,0][0,0,1] (PICVR=2)

Zt=2; Zn=2

**Class IIIa Z=4[2\*2]**

Coordination sequences  
-----

Zn1: 1 2 3 4 5 6 7 8 9 10

Num 4 12 24 42 64 92 124 162 204 252

Cum 5 17 41 83 147 239 363 525 729 981  
-----

TD10=981

Vertex symbols for selected sublattice  
-----

Zn1 Point symbol: {6^6}

Extended point symbol:[6(2).6(2).6(2).6(2).6(2).6(2)]  
-----

Point symbol for net: {6^6}

4-c net; uninodal net



Topological type: dia Diamond; 4/6/c1; sqc6 (topos&RCSR.ttd) {6^6} - VS [6(2).6(2).6(2).6(2).6(2).6(2)]  
(16813 types in 3 databases)

#####

TOPOS analysis results for **2**

#####

Topology for Zn1

-----

Atom Zn1 links by bridge ligands and has

| Common vertex with |        |         |         |           |         | R(A-A) |  |
|--------------------|--------|---------|---------|-----------|---------|--------|--|
| Zn 1               | 0.2498 | 0.7467  | 0.8170  | (-1 1 0)  | 12.146A | 1      |  |
| Zn 1               | 1.2498 | 0.7467  | -0.1830 | (0 1 -1)  | 12.146A | 1      |  |
| Zn 1               | 0.2498 | -0.2533 | -0.1830 | (-1 0 -1) | 12.295A | 1      |  |
| Zn 1               | 1.2498 | -0.2533 | 0.8170  | (0 0 0)   | 12.295A | 1      |  |

Topology for Zn2

-----

Atom Zn2 links by bridge ligands and has

| Common vertex with |         |         |        |           |         | R(A-A) |  |
|--------------------|---------|---------|--------|-----------|---------|--------|--|
| Zn 2               | -0.2538 | 0.7470  | 0.3595 | (-1 1 -1) | 12.153A | 1      |  |
| Zn 2               | 0.7462  | 0.7470  | 1.3595 | (0 1 0)   | 12.153A | 1      |  |
| Zn 2               | -0.2538 | -0.2530 | 1.3595 | (-1 0 0)  | 12.288A | 1      |  |
| Zn 2               | 0.7462  | -0.2530 | 0.3595 | (0 0 -1)  | 12.288A | 1      |  |

-----  
Structural group analysis

-----

-----

Structural group No 1

-----

Structure consists of 3D framework with Zn

There are 2 interpenetrating nets

FIV: Full interpenetration vectors

-----

[1,0,0] (10.44A)

-----

PIC: [2,0,0][1,0,1][1,1,0] (PICVR=2)

Zt=2; Zn=1

**Class Ia Z=2**

Coordination sequences

-----  
Zn1: 1 2 3 4 5 6 7 8 9 10  
Num 4 12 24 42 64 92 124 162 204 252  
Cum 5 17 41 83 147 239 363 525 729 981  
-----

TD10=981

Vertex symbols for selected sublattice

-----  
Zn1 Point symbol: {6^6}  
Extended point symbol: [6(2).6(2).6(2).6(2).6(2).6(2)]  
-----

Point symbol for net: {6^6}  
4-c net; uninodal net

Topological type: dia Diamond; 4/6/c1; sqc6 (topos&RCSR.ttd) {6^6} - VS [6(2).6(2).6(2).6(2).6(2).6(2)]  
(16813 types in 3 databases)

-----  
Structural group No 2  
-----

Structure consists of 3D framework with Zn  
There are 2 interpenetrating nets  
FIV: Full interpenetration vectors

-----  
[1,0,0] (10.44A)  
-----

PIC: [2,0,0][1,0,1][1,1,0] (PICVR=2)

Zt=2; Zn=1

**Class Ia Z=2**

Coordination sequences

-----  
Zn2: 1 2 3 4 5 6 7 8 9 10  
Num 4 12 24 42 64 92 124 162 204 252  
Cum 5 17 41 83 147 239 363 525 729 981  
-----

TD10=981

Vertex symbols for selected sublattice

-----  
Zn2 Point symbol: {6^6}

Extended point symbol: [6(2).6(2).6(2).6(2).6(2).6(2)]

-----  
Point symbol for net: {6^6}

4-c net; uninodal net

Topological type: dia Diamond; 4/6/c1; sqc6 (topos&RCSR.ttd) {6^6} - VS [6(2).6(2).6(2).6(2).6(2).6(2)]  
(16813 types in 3 databases)

Totally **4(2+2)** interpenetrating nets

**Table S1** Bond Lengths for **1**.

| Atom | Atom             | Length/Å | Atom | Atom             | Length/Å |
|------|------------------|----------|------|------------------|----------|
| Zn1  | O3               | 1.981(2) | N6   | C18              | 1.350(4) |
| Zn1  | N3               | 2.056(2) | O2   | C1               | 1.230(5) |
| Zn1  | N4               | 2.066(3) | N2   | C9               | 1.302(4) |
| Zn1  | O1               | 2.043(3) | C13  | C14              | 1.383(5) |
| Zn1  | O2               | 2.327(3) | C13  | C12              | 1.383(5) |
| Zn1  | C10 <sup>1</sup> | 2.586(3) | C14  | C15              | 1.384(4) |
| O3   | C10 <sup>1</sup> | 1.254(4) | C10  | Zn1 <sup>2</sup> | 2.586(3) |
| N1   | C8               | 1.348(4) | C10  | O3 <sup>2</sup>  | 1.254(4) |
| N1   | C9               | 1.371(4) | C10  | C11              | 1.504(4) |
| N1   | C5               | 1.426(4) | C12  | C11              | 1.387(4) |
| N3   | N2               | 1.381(4) | C2   | C3               | 1.381(5) |
| N3   | C8               | 1.307(4) | C2   | C1 <sup>3</sup>  | 1.509(5) |
| O4   | C10              | 1.230(4) | C2   | C7               | 1.376(6) |
| N4   | C17              | 1.309(4) | C3   | C4               | 1.401(5) |
| N4   | N5               | 1.365(4) | C5   | C6               | 1.396(5) |
| C17  | N6               | 1.339(4) | C5   | C4               | 1.376(4) |
| O1   | C1               | 1.259(5) | N5   | C18              | 1.304(5) |
| C16  | C11              | 1.397(4) | C6   | C7               | 1.390(5) |
| C16  | C15              | 1.380(4) | C1   | C2 <sup>4</sup>  | 1.509(5) |
| N6   | C14              | 1.436(4) |      |                  |          |

**Table S2** Bond Angles for **1**.

| Atom | Atom | Atom             | Angle/°    | Atom            | Atom | Atom             | Angle/°   |
|------|------|------------------|------------|-----------------|------|------------------|-----------|
| O3   | Zn1  | N3               | 103.94(10) | C12             | C13  | C14              | 118.5(3)  |
| O3   | Zn1  | N4               | 93.08(10)  | N3              | C8   | N1               | 109.5(3)  |
| O3   | Zn1  | O1               | 149.95(12) | C13             | C14  | N6               | 119.1(3)  |
| O3   | Zn1  | O2               | 103.87(10) | C13             | C14  | C15              | 121.7(3)  |
| O3   | Zn1  | C10 <sup>1</sup> | 28.10(10)  | C15             | C14  | N6               | 119.2(3)  |
| N3   | Zn1  | N4               | 98.13(10)  | O3 <sup>2</sup> | C10  | Zn1 <sup>2</sup> | 48.07(15) |
| N3   | Zn1  | O2               | 150.63(10) | O3 <sup>2</sup> | C10  | C11              | 116.8(3)  |
| N3   | Zn1  | C10 <sup>1</sup> | 96.61(10)  | O4              | C10  | Zn1 <sup>2</sup> | 74.52(18) |
| N4   | Zn1  | O2               | 89.61(11)  | O4              | C10  | O3 <sup>2</sup>  | 122.5(3)  |
| N4   | Zn1  | C10 <sup>1</sup> | 121.14(10) | O4              | C10  | C11              | 120.6(3)  |
| O1   | Zn1  | N3               | 91.53(11)  | C11             | C10  | Zn1 <sup>2</sup> | 164.6(2)  |
| O1   | Zn1  | N4               | 110.29(11) | C13             | C12  | C11              | 120.9(3)  |
| O1   | Zn1  | O2               | 59.33(11)  | C3              | C2   | C1 <sup>3</sup>  | 120.9(3)  |

|                  |     |                  |            |     |     |                 |          |
|------------------|-----|------------------|------------|-----|-----|-----------------|----------|
| O1               | Zn1 | C10 <sup>1</sup> | 125.89(11) | C7  | C2  | C3              | 120.5(3) |
| O2               | Zn1 | C10 <sup>1</sup> | 103.52(10) | C7  | C2  | C1 <sup>3</sup> | 118.6(3) |
| C10 <sup>1</sup> | O3  | Zn1              | 103.8(2)   | C16 | C11 | C10             | 119.6(3) |
| C8               | N1  | C9               | 105.3(2)   | C12 | C11 | C16             | 119.5(3) |
| C8               | N1  | C5               | 127.5(3)   | C12 | C11 | C10             | 120.9(3) |
| C9               | N1  | C5               | 127.2(3)   | N2  | C9  | N1              | 110.4(3) |
| N2               | N3  | Zn1              | 121.91(18) | C2  | C3  | C4              | 120.1(3) |
| C8               | N3  | Zn1              | 129.4(2)   | C16 | C15 | C14             | 119.3(3) |
| C8               | N3  | N2               | 108.5(2)   | C6  | C5  | N1              | 118.3(3) |
| C17              | N4  | Zn1              | 123.4(2)   | C4  | C5  | N1              | 119.8(3) |
| C17              | N4  | N5               | 108.2(3)   | C4  | C5  | C6              | 121.9(3) |
| N5               | N4  | Zn1              | 128.1(2)   | C18 | N5  | N4              | 105.6(3) |
| N4               | C17 | N6               | 110.1(3)   | C7  | C6  | C5              | 118.2(3) |
| C1               | O1  | Zn1              | 94.9(2)    | C5  | C4  | C3              | 118.6(3) |
| C15              | C16 | C11              | 120.0(3)   | O1  | C1  | C2 <sup>4</sup> | 117.1(4) |
| C17              | N6  | C14              | 126.0(3)   | O2  | C1  | O1              | 122.0(3) |
| C17              | N6  | C18              | 104.5(3)   | O2  | C1  | C2 <sup>4</sup> | 120.9(4) |
| C18              | N6  | C14              | 129.6(3)   | C2  | C7  | C6              | 120.7(3) |
| C1               | O2  | Zn1              | 82.7(2)    | N5  | C18 | N6              | 111.6(3) |
| C9               | N2  | N3               | 106.3(2)   |     |     |                 |          |

<sup>1</sup>-1/2+X,-1/2-Y,-Z; <sup>2</sup>1/2+X,-1/2-Y,-Z; <sup>3</sup>+X,1/2-Y,-1/2+Z; <sup>4</sup>+X,1/2-Y,1/2+Z

**Table S3** Bond Lengths for **2**.

| Atom | Atom             | Length/Å  | Atom | Atom             | Length/Å  |
|------|------------------|-----------|------|------------------|-----------|
| Zn1  | O4               | 2.097(8)  | N4   | C18              | 1.386(14) |
| Zn1  | N2               | 2.015(8)  | C29  | C28              | 1.486(15) |
| Zn1  | O1               | 1.980(6)  | C29  | C34              | 1.383(15) |
| Zn1  | O3               | 2.284(10) | C29  | C30              | 1.436(16) |
| Zn1  | N5               | 2.021(8)  | C15  | C14              | 1.397(15) |
| Zn2  | O8               | 2.133(8)  | C15  | C16              | 1.415(15) |
| Zn2  | O5               | 1.978(6)  | C23  | C22              | 1.409(14) |
| Zn2  | N8               | 2.093(9)  | C23  | C24 <sup>2</sup> | 1.343(17) |
| Zn2  | O7               | 2.358(9)  | C28  | Zn2 <sup>3</sup> | 2.536(11) |
| Zn2  | N11              | 2.073(9)  | C28  | O8 <sup>3</sup>  | 1.284(14) |
| O8   | C28 <sup>1</sup> | 1.284(14) | C28  | O7 <sup>3</sup>  | 1.221(15) |
| O5   | C19              | 1.247(12) | C19  | C20              | 1.525(13) |
| N8   | C27              | 1.312(12) | C14  | C13              | 1.364(13) |
| N8   | N9               | 1.355(13) | C20  | C21              | 1.408(15) |
| O4   | C10              | 1.243(14) | C20  | C25              | 1.386(14) |

|     |                  |           |     |                  |           |
|-----|------------------|-----------|-----|------------------|-----------|
| N2  | C9               | 1.289(12) | C2  | C3               | 1.411(16) |
| N2  | N3               | 1.422(14) | C2  | C1 <sup>4</sup>  | 1.519(14) |
| C32 | N10              | 1.408(12) | C2  | C7               | 1.423(15) |
| C32 | C31              | 1.472(14) | C31 | C30              | 1.316(15) |
| C32 | C33              | 1.354(15) | C36 | N12              | 1.306(15) |
| O1  | C1               | 1.254(12) | C16 | C11              | 1.384(15) |
| O7  | C28 <sup>1</sup> | 1.221(15) | N6  | C18              | 1.265(14) |
| O3  | C10              | 1.267(14) | C11 | C10 <sup>5</sup> | 1.415(16) |
| C35 | N11              | 1.252(12) | C11 | C12              | 1.428(14) |
| C35 | N10              | 1.327(13) | C21 | C22 <sup>6</sup> | 1.381(16) |
| O6  | C19              | 1.222(12) | C34 | C33              | 1.413(14) |
| N1  | C9               | 1.294(13) | C4  | C3               | 1.302(17) |
| N1  | C5               | 1.443(15) | C4  | C5               | 1.409(16) |
| N1  | C8               | 1.441(16) | C10 | C11 <sup>7</sup> | 1.415(16) |
| N5  | C17              | 1.312(12) | C22 | C21 <sup>2</sup> | 1.381(16) |
| N5  | N6               | 1.407(11) | C5  | C6               | 1.389(17) |
| N7  | C27              | 1.345(12) | C8  | N3               | 1.300(19) |
| N7  | C23              | 1.415(12) | C6  | C7               | 1.340(18) |
| N7  | C26              | 1.412(13) | N9  | C26              | 1.352(15) |
| N11 | N12              | 1.380(13) | C12 | C13              | 1.383(13) |
| C17 | N4               | 1.353(12) | C25 | C24              | 1.375(14) |
| N10 | C36              | 1.320(13) | C1  | C2 <sup>8</sup>  | 1.519(14) |
| O2  | C1               | 1.251(12) | C24 | C23 <sup>6</sup> | 1.343(17) |
| N4  | C14              | 1.445(12) |     |                  |           |

**Table S4** Bond Angles for **2**

| Atom | Atom | Atom | Angle/°  | Atom             | Atom | Atom             | Angle/°   |
|------|------|------|----------|------------------|------|------------------|-----------|
| O4   | Zn1  | O3   | 58.2(3)  | C14              | C15  | C16              | 118.9(9)  |
| N2   | Zn1  | O4   | 96.0(4)  | C22              | C23  | N7               | 118.1(9)  |
| N2   | Zn1  | O3   | 103.5(4) | C24 <sup>2</sup> | C23  | N7               | 120.7(9)  |
| N2   | Zn1  | N5   | 115.2(4) | C24 <sup>2</sup> | C23  | C22              | 120.8(9)  |
| O1   | Zn1  | O4   | 109.3(3) | O8 <sup>3</sup>  | C28  | Zn2 <sup>3</sup> | 57.2(5)   |
| O1   | Zn1  | N2   | 94.3(3)  | O8 <sup>3</sup>  | C28  | C29              | 116.9(11) |
| O1   | Zn1  | O3   | 159.0(3) | O7 <sup>3</sup>  | C28  | Zn2 <sup>3</sup> | 67.6(7)   |
| O1   | Zn1  | N5   | 100.3(3) | O7 <sup>3</sup>  | C28  | O8 <sup>3</sup>  | 124.7(11) |
| N5   | Zn1  | O4   | 134.9(3) | O7 <sup>3</sup>  | C28  | C29              | 118.4(10) |
| N5   | Zn1  | O3   | 82.4(3)  | C29              | C28  | Zn2 <sup>3</sup> | 172.7(9)  |
| O8   | Zn2  | O7   | 59.0(3)  | O5               | C19  | C20              | 117.0(8)  |
| O5   | Zn2  | O8   | 107.7(3) | O6               | C19  | O5               | 122.4(9)  |
| O5   | Zn2  | N8   | 95.6(3)  | O6               | C19  | C20              | 120.5(9)  |

|                  |     |     |           |                  |     |                  |           |
|------------------|-----|-----|-----------|------------------|-----|------------------|-----------|
| O5               | Zn2 | O7  | 160.4(3)  | C15              | C14 | N4               | 118.0(8)  |
| O5               | Zn2 | N11 | 102.0(3)  | C13              | C14 | N4               | 120.2(9)  |
| N8               | Zn2 | O8  | 100.9(4)  | C13              | C14 | C15              | 121.6(9)  |
| N8               | Zn2 | O7  | 100.9(3)  | C21              | C20 | C19              | 121.8(9)  |
| N11              | Zn2 | O8  | 135.4(3)  | C25              | C20 | C19              | 119.0(8)  |
| N11              | Zn2 | N8  | 108.5(4)  | C25              | C20 | C21              | 118.9(9)  |
| N11              | Zn2 | O7  | 82.7(3)   | C3               | C2  | C1 <sup>4</sup>  | 125.1(10) |
| C28 <sup>1</sup> | O8  | Zn2 | 92.4(7)   | C3               | C2  | C7               | 116.5(10) |
| C19              | O5  | Zn2 | 110.8(6)  | C7               | C2  | C1 <sup>4</sup>  | 118.2(9)  |
| C27              | N8  | Zn2 | 125.7(7)  | C30              | C31 | C32              | 120.4(10) |
| C27              | N8  | N9  | 111.0(8)  | N12              | C36 | N10              | 111.7(10) |
| N9               | N8  | Zn2 | 122.7(6)  | C11              | C16 | C15              | 120.3(10) |
| C10              | O4  | Zn1 | 97.2(7)   | C18              | N6  | N5               | 107.3(8)  |
| C9               | N2  | Zn1 | 132.1(7)  | N2               | C9  | N1               | 114.4(9)  |
| C9               | N2  | N3  | 106.6(8)  | C16              | C11 | C10 <sup>5</sup> | 120.4(10) |
| N3               | N2  | Zn1 | 120.3(7)  | C16              | C11 | C12              | 118.4(10) |
| N10              | C32 | C31 | 121.8(9)  | C10 <sup>5</sup> | C11 | C12              | 121.2(10) |
| C33              | C32 | N10 | 120.8(9)  | C22 <sup>6</sup> | C21 | C20              | 120.3(10) |
| C33              | C32 | C31 | 117.4(10) | C29              | C34 | C33              | 120.1(10) |
| C1               | O1  | Zn1 | 111.4(6)  | C36              | N12 | N11              | 103.3(9)  |
| C28 <sup>1</sup> | O7  | Zn2 | 83.8(7)   | C31              | C30 | C29              | 122.2(10) |
| C10              | O3  | Zn1 | 87.8(8)   | C3               | C4  | C5               | 119.5(11) |
| N11              | C35 | N10 | 110.8(8)  | N6               | C18 | N4               | 110.9(10) |
| C9               | N1  | C5  | 130.0(10) | O4               | C10 | O3               | 116.7(10) |
| C9               | N1  | C8  | 103.0(9)  | O4               | C10 | C11 <sup>7</sup> | 123.4(11) |
| C8               | N1  | C5  | 126.0(11) | O3               | C10 | C11 <sup>7</sup> | 119.9(11) |
| C17              | N5  | Zn1 | 130.2(6)  | C4               | C3  | C2               | 123.0(10) |
| C17              | N5  | N6  | 106.8(7)  | C32              | C33 | C34              | 122.1(10) |
| N6               | N5  | Zn1 | 123.0(6)  | C21 <sup>2</sup> | C22 | C23              | 118.3(10) |
| C27              | N7  | C23 | 130.6(8)  | C4               | C5  | N1               | 121.9(11) |
| C27              | N7  | C26 | 106.1(8)  | C6               | C5  | N1               | 117.9(11) |
| C26              | N7  | C23 | 123.3(8)  | C6               | C5  | C4               | 119.7(12) |
| C35              | N11 | Zn2 | 130.2(7)  | N3               | C8  | N1               | 109.3(12) |
| C35              | N11 | N12 | 109.1(8)  | C7               | C6  | C5               | 120.3(12) |
| N12              | N11 | Zn2 | 120.6(6)  | C26              | N9  | N8               | 106.2(8)  |
| N8               | C27 | N7  | 108.9(8)  | C13              | C12 | C11              | 121.1(9)  |
| N5               | C17 | N4  | 110.1(8)  | N9               | C26 | N7               | 107.8(9)  |
| C35              | N10 | C32 | 129.4(8)  | C24              | C25 | C20              | 119.4(10) |
| C36              | N10 | C32 | 126.1(9)  | C8               | N3  | N2               | 105.4(9)  |
| C36              | N10 | C35 | 104.5(8)  | O1               | C1  | C2 <sup>8</sup>  | 117.4(9)  |
| C17              | N4  | C14 | 127.4(8)  | O2               | C1  | O1               | 126.3(9)  |



|     |     |     |           |                  |     |                 |           |
|-----|-----|-----|-----------|------------------|-----|-----------------|-----------|
| C17 | N4  | C18 | 104.4(8)  | O2               | C1  | C2 <sup>8</sup> | 116.2(9)  |
| C18 | N4  | C14 | 127.6(9)  | C14              | C13 | C12             | 119.4(9)  |
| C34 | C29 | C28 | 119.1(10) | C23 <sup>6</sup> | C24 | C25             | 121.3(10) |
| C34 | C29 | C30 | 117.7(9)  | C6               | C7  | C2              | 120.7(11) |
| C30 | C29 | C28 | 122.9(10) |                  |     |                 |           |

<sup>1</sup>1/2+X,1-Y,1/2+Z; <sup>2</sup>1/2+X,-Y,-1/2+Z; <sup>3</sup>-1/2+X,1-Y,-1/2+Z; <sup>4</sup>-1/2+X,-Y,-1/2+Z; <sup>5</sup>1/2+X,1-Y,-1/2+Z; <sup>6</sup>-1/2+X,-Y,1/2+Z; <sup>7</sup>-1/2+X,1-Y,1/2+Z; <sup>8</sup>1/2+X,-Y,1/2+Z
